# Supplementary material
Source: PubMed Central journal article supplement (PMC2787691)
Supplement: NIHMS149564-supplement-1.pdf [file NIHMS149564-supplement-1.pdf]

## Supplementary Information

### **Etv4 and Etv5 are required downstream of GDNF and Ret for kidney branching morphogenesis.**

Benson Lu, Cristina Cebrian, Xuan Chi, Satu Kuure, Richard Kuo, Carlton M. Bates, Silvia Arber, John Hassell, Lesley MacNeil, Masato Hoshi, Sanjay Jain, Naoya Asai, Masahide Takahashi, Kai Schmidt-Ott, Jonathan Barasch, Vivette D'Agati, and Frank Costantini

#### Contents

Supplementary Figures 1 - 6

Supplementary Tables 1 – 5

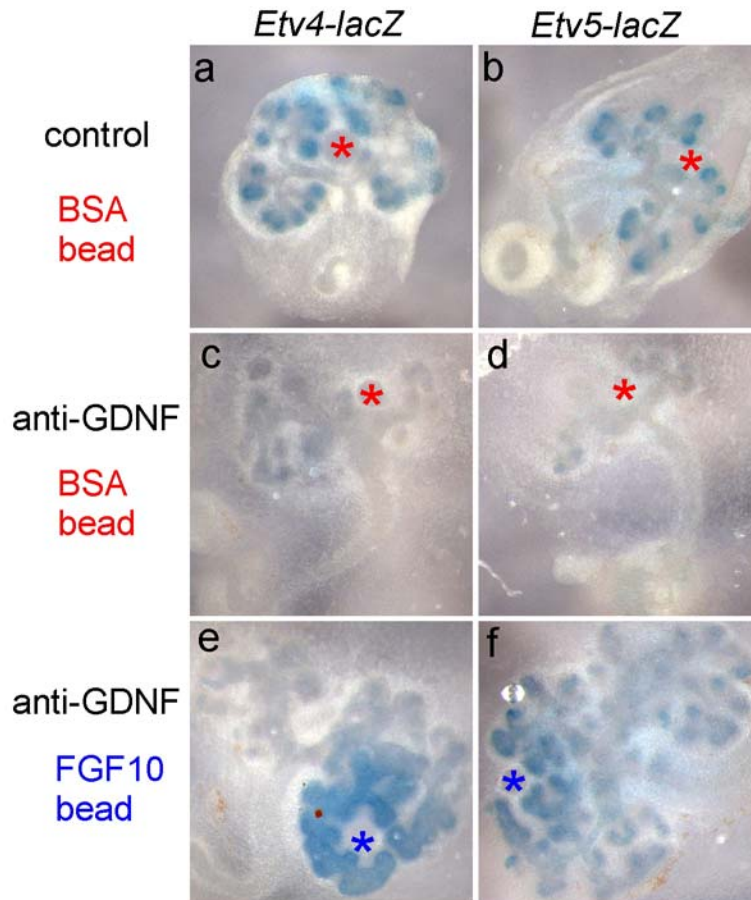

**Supplementary Figure 1. Expression of *Etv4* and *Etv5* is blocked by anti-GDNF, and can be restored by FGF10.** *Etv4-lacZ* or *Etv5-lacZ* (heterozygous) E11.5 kidneys were cultured for 3 days in normal medium (**a-b**) or with anti-GDNF blocking antibody (**c-f**), and with a control BSA-soaked bead (**a-d**) or FGF10-soaked bead (**e, f**), then stained for  $\beta$ -galactosidase. Expression of *Etv4-lacZ* or *Etv5-lacZ* is virtually extinguished by the anti-GDNF (**c-d**), but maintained in the vicinity of the FGF10 bead (**e-f**). The ability of FGF10 to upregulate *Etv4* and *Etv5*, even when GDNF signaling is blocked, indicates that it does not act by increasing GDNF expression.

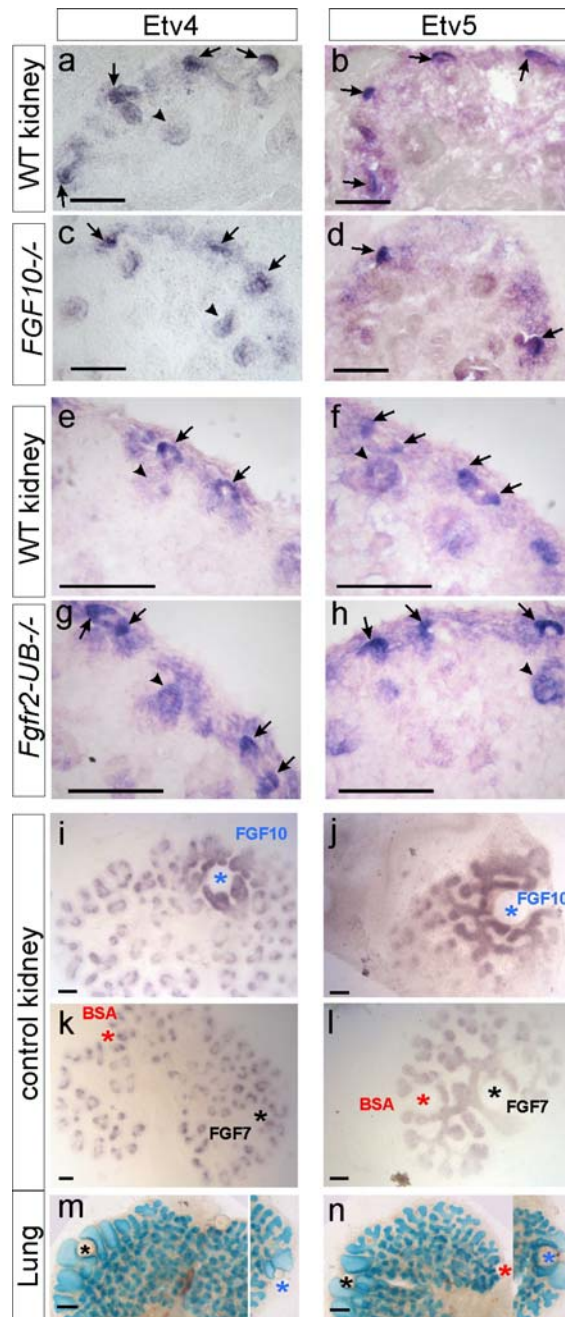

**Supplementary Figure 2. Expression of *Etv4* and *Etv5* is not decreased by loss of *Fgf10*, or by loss of *Fgfr2* in the UB, but can be increased by excess FGF10. a-d,** Expression of *Etv4* and *Etv5* mRNAs in *Fgf10*<sup>-/-</sup> kidneys (c,d) (E14.5) is similar to that in WT kidneys (a,b). **e-h,** Expression of *Etv4* and *Etv5* mRNAs in kidneys lacking *Fgfr2* in the UB (g,h) (E15.5) is similar to that in WT kidneys (e,f). Arrows, UB tips; arrowheads, nascent nephrons. **i-l,** Culture of E12.5 kidneys for 72 hrs with beads soaked in FGF10 (blue asterisks) upregulates expression of *Etv4* and *Etv5* in the UB (i,j), while FGF7 beads (black asterisks) or BSA control beads (red asterisks) do not (k,l). **m-n,** In control E14.5 lung cultures, both FGF7 and FGF10 beads induce enlargement of adjacent lung branches, confirming the activity of the two FGFs. Scale bars 100  $\mu$ M.

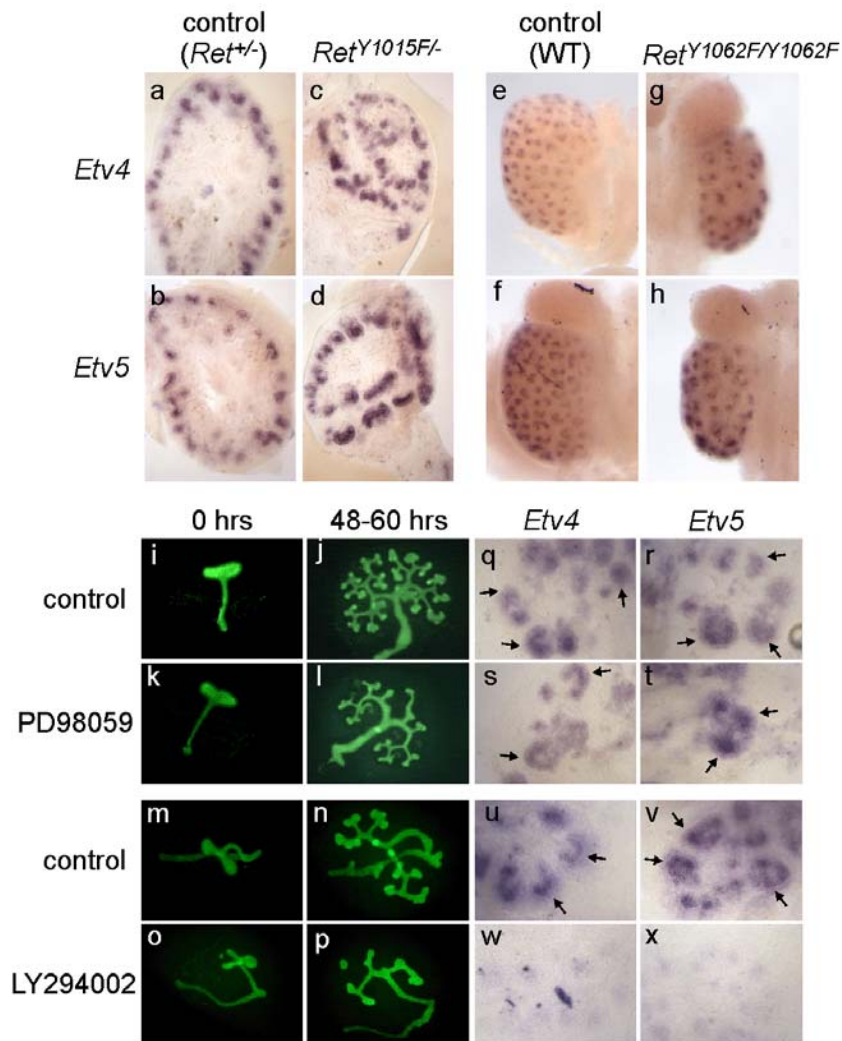

**Supplementary Figure 3. Expression of *Etv4* and *Etv5* in the UB tips requires PI3K, but not Erk MAP kinase or PLC- $\gamma$  signaling.** **a-d**, expression of *Etv4* and *Etv5* mRNAs in UB tips of *Ret*<sup>Y1015F/-</sup> or control E14.5 kidneys. The *Ret*<sup>Y1015F</sup> mutation fully blocks PLC- $\gamma$  phosphorylation and causes abnormal UB branching, but has no effect on *Etv4* and *Etv5* expression. **e-h**, expression of *Etv4* and *Etv5* mRNAs in UB tips of *Ret*<sup>Y1062F/Y1062F</sup> or control E14.5 kidneys. The *Ret*<sup>Y1062F</sup> mutation reduces, but does not eliminate both PI3K and Erk MAP kinase signaling, and causes reduced UB branching, but it has no effect on *Etv4* and *Etv5* expression (whole mount ISH). **i-p**, culture of WT E11.5 kidneys (carrying *Hoxb7/GFP*) with 50  $\mu$ M PD98059 (specific inhibitor of Erk MAP kinase kinase) or 20  $\mu$ M LY294002 (specific inhibitor of PI3K) causes moderately (PD98059) or severely (LY294002) reduced UB branching, consistent with previous observations (see text), thus confirming the efficacy of the inhibitors. **q-t**, expression of *Etv4* and *Etv5* shows little or no reduction in UB tips (arrows) of WT kidneys cultured with PD98059 for 48 hours, although there are fewer UB tips. **u-x**, culture of WT kidneys with LY294002 for 48hrs eliminates expression of *Etv4* and *Etv5*.

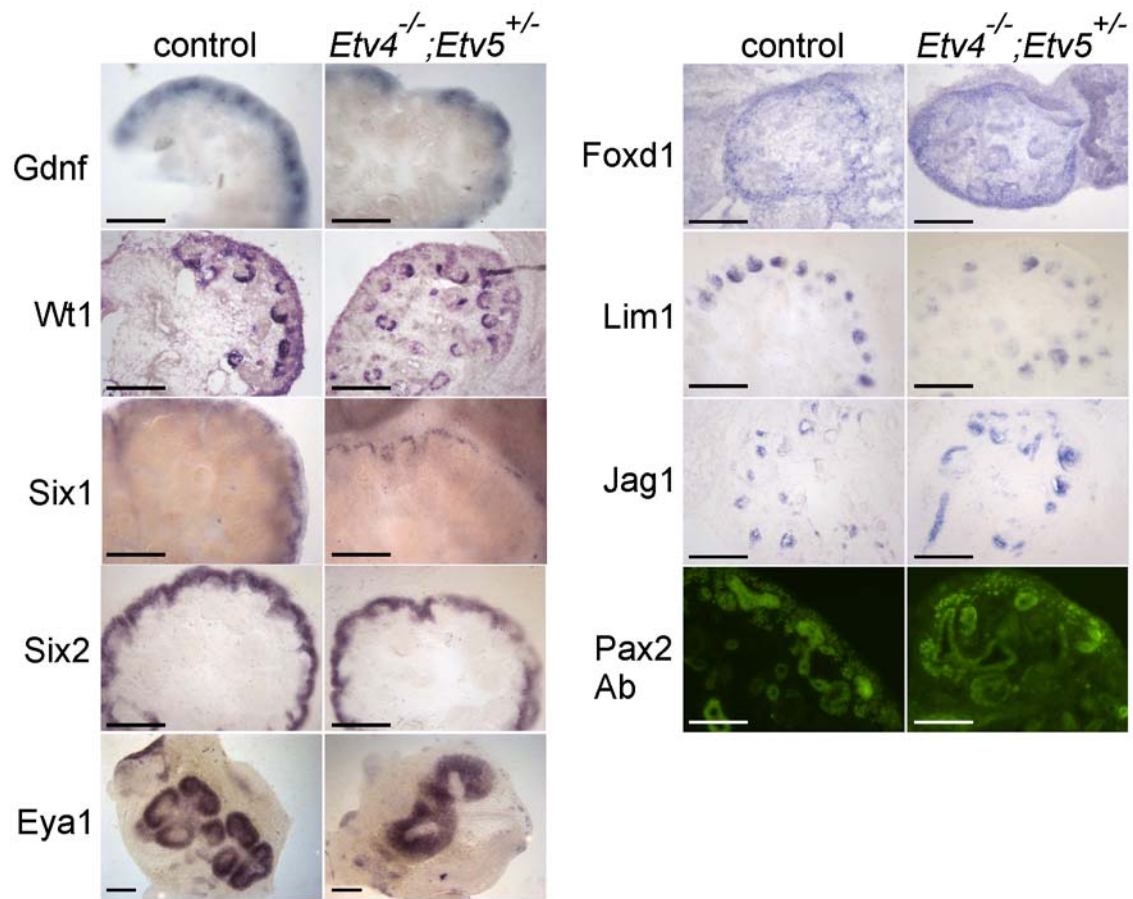

**Supplementary Figure 4. Normal expression of markers of metanephric mesenchyme, stroma and nascent nephrons in *Etv4*<sup>-/-</sup>;*Etv5*<sup>+/-</sup> kidneys.**

Gene expression was examined by ISH or (for *Pax2*) antibody staining. The markers label renal stroma (*Foxd1*), metanephric mesenchyme (*Gdnf*, *Wt1*, *Six1*, *Six2*, *Eya1*, *Pax2*), renal vesicles (*Pax2*, *Lim1*, *Jag1*), comma- and S-shaped bodies (*Lim1*, *Jag1*), and podocytes (*Wt1*, *Lim1*). Although there are fewer UB tips and correspondingly fewer caps of MM and nephrons in the *Etv4*<sup>-/-</sup>;*Etv5*<sup>+/-</sup> kidneys, the expression of all these genes occurs at similar levels to the wild type. Scale bars = 100  $\mu$ m. Kidneys were at E13.5 (*Foxd1*), E14.5 (*Wt1*, *Six2*, *Jag1*, *Pax2*), E15.5 (*Gdnf*, *Six2*, *Lim1*), or E11.5 + 2 days culture (*Eya1*).

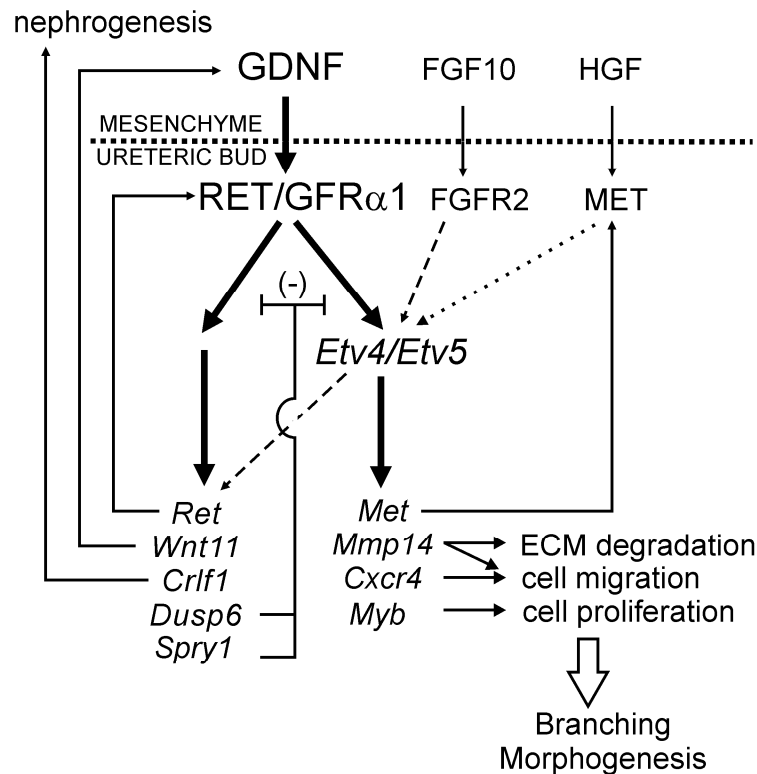

**Supplementary Figure 5. Proposed role of *Etv4* and *Etv5* in a gene network controlling ureteric bud branching morphogenesis.** GDNF from the mesenchyme signals to the UB via RET and GFR $\alpha$ 1, thus regulating a set of downstream genes (bold arrows), including *Etv4* and *Etv5*. FGF10 signaling normally has a lesser role, if any, in regulating *Etv4/Etv5* expression in the UB (dashed arrow). Several of the genes downstream of *Ret* (e.g., *Met*, *Mmp14*, *Cxcr4*, *Myb*) are apparently regulated via *Etv4* and *Etv5*, as their expression is extinguished in *Etv4*<sup>-/-</sup>;*Etv5*<sup>+/-</sup> kidneys. Other GDNF-induced genes (e.g., *Ret*, *Wnt11*, *Crlf1*, *Dusp6*, *Spry1*) are relatively insensitive to *Etv4/Etv5* levels (dashed arrow) and are likely regulated via other mechanisms. Collectively, these downstream genes compose part of a regulatory network that promotes UB branching morphogenesis, and other aspects of kidney development. In three positive feedback loops, *Ret* signaling positively regulates its own expression, *Wnt11* upregulates *Gdnf*, and *Met* encodes the receptor for HGF, which may also upregulate *Etv4/Etv5* (dotted arrow). *Spry1* and *Dusp6* are inhibitors of RTK signaling that participate in negative feedback loops. *Crlf1* may participate in nephrogenesis. *Mmp14*, *Cxcr4*, and *Myb* are likely to contribute to cellular processes important for UB morphogenesis (see Discussion).

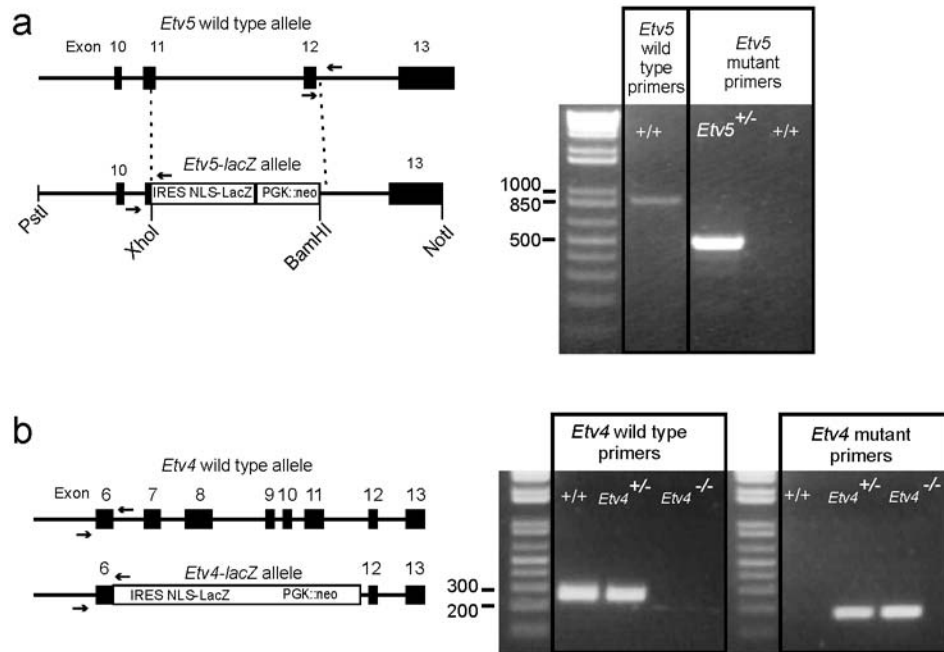

**Supplementary Figure 6. Construction of *Etv5-lacZ* allele, and genotyping of *Etv4-lacZ* and *Etv5-lacZ* alleles.** **a**, schematic diagram of wild type *Etv5* and targeted *Etv5-lacZ* allele and PCR assays used for genotyping mice. Arrows indicate locations of PCR primers used for genotyping. One pair of primers amplifies a band of 833 bp from only the wild type *Etv5* allele, while a second primer pair amplifies a band of ~500 bp from the *Etv5-lacZ* (but not wild type) allele. **b**, schematic diagram of wild type *Etv4* and *Etv4-lacZ* alleles and PCR assays used for genotyping mice. One pair of primers amplifies a band of 247 bp from only the wild type *Etv4* allele, while a second primer pair amplifies a band of ~200 bp from the *Etv4-lacZ* (but not wild type *Etv4*) allele.

**Supplementary Table 1 (following 2 pages). Changes in gene expression patterns in ureteric buds cultured +/- GDNF (Murine Genome Set U74Av2).** Data are sorted for "fold change". Only genes with >2-fold change are listed. Full data are available at GEO.



Supplementary Table 1. Chip U74Av2

| gene                                                               | fold change | lower bound of FC | upper bound of FC |
|--------------------------------------------------------------------|-------------|-------------------|-------------------|
| Wnt11: wingless-related MMTV integration site 11                   | 27.37       | 15.98             | 76.07             |
| Cxcr4: chemokine (C-X-C motif) receptor 4                          | 14.75       | 8.42              | 22.83             |
| Crlf1: cytokine receptor-like factor 1                             | 5.00        | 3.19              | 8.69              |
| Arg2: arginase type II                                             | 4.24        | 3.62              | 5.02              |
| Myb: myeloblastosis oncogene                                       | 3.86        | 2.11              | 12.52             |
| Ret: ret proto-oncogene                                            | 3.72        | 2.1               | 6.26              |
| Car2: carbonic anhydrase 2                                         | 3.52        | 2.17              | 5                 |
| Mtm1: X-linked myotubular myopathy gene 1                          | 3.35        | 2.7               | 4.31              |
| E2f8: E2F transcription factor 8                                   | 3.34        | 2.77              | 4.08              |
| Dusp6: dual specificity phosphatase 6                              | 3.32        | 1.84              | 16.18             |
| Limch1: LIM and calponin homology domains 1                        | 3.14        | 2.11              | 5.71              |
| Ncaph: non-SMC condensin I complex, subunit H                      | 3.04        | 2.21              | 4.79              |
| Etv4: ets variant gene 4 (E1A enhancer binding protein, E1AF)      | 3.03        | 2.33              | 3.91              |
| Kit: kit oncogene                                                  | 3.02        | 2.13              | 4.2               |
| C330027C09Rik: RIKEN cDNA C330027C09 gene                          | 2.98        | 2.06              | 4.87              |
| Ect2: ect2 oncogene                                                | 2.96        | 2.57              | 3.48              |
| Spred2: sprouty-related, EVH1 domain containing 2                  | 2.96        | 1.92              | 6.17              |
| Ncaph: non-SMC condensin I complex, subunit H                      | 2.94        | 2.1               | 4.56              |
| 2810417H13Rik: RIKEN cDNA 2810417H13 gene                          | 2.88        | 2.18              | 3.94              |
| Snrpd3: small nuclear ribonucleoprotein D3                         | 2.87        | 1.88              | 4.4               |
| Scd1: stearyl-Coenzyme A desaturase 1                              | 2.86        | 1.82              | 4.86              |
| Mycn: v-myc myelocytomatosis viral related oncogene, neuroblasto   | 2.83        | 2.09              | 3.63              |
| Mki67: antigen identified by monoclonal antibody Ki 67             | 2.83        | 2.02              | 4.53              |
| Cdca8: cell division cycle associated 8                            | 2.72        | 1.98              | 4.12              |
| Ccnd1: cyclin D1                                                   | 2.67        | 1.62              | 6.81              |
| 2700099C18Rik: RIKEN cDNA 2700099C18 gene                          | 2.59        | 1.52              | 8.73              |
| LOC14210: hypothetical LOC14210                                    | 2.59        | 1.47              | 4.15              |
| Bub1: budding uninhibited by benzimidazoles 1 homolog (S. cerevis) | 2.58        | 1.47              | 6.19              |
| Gmnn: geminin                                                      | 2.56        | 1.97              | 3.61              |
| Ctnnd2 /// LOC100045979: catenin (cadherin associated protein), d  | 2.54        | 2.03              | 3.15              |
| Rrm2: ribonucleotide reductase M2                                  | 2.53        | 1.77              | 4.07              |
| Ccnb1: cyclin B1                                                   | 2.47        | 1.73              | 4.06              |
| Dna2: DNA replication helicase 2 homolog (yeast)                   | 2.45        | 1.62              | 4.21              |
| Kif20a: kinesin family member 20A                                  | 2.44        | 2.04              | 2.99              |
| Cenpk: centromere protein K                                        | 2.42        | 1.86              | 3.39              |
| Nusap1: nucleolar and spindle associated protein 1                 | 2.42        | 1.91              | 3.27              |
| Topbp1: topoisomerase (DNA) II binding protein 1                   | 2.40        | 1.65              | 3.58              |
| Smc4: structural maintenance of chromosomes 4                      | 2.40        | 2.00              | 2.93              |
| Kif11: kinesin family member 11                                    | 2.39        | 1.85              | 3.32              |
| Mest: mesoderm specific transcript                                 | 2.38        | 1.66              | 3.99              |
| Ccnb2: cyclin B2                                                   | 2.37        | 1.77              | 3.41              |
| Uhrf1: ubiquitin-like, containing PHD and RING finger domains, 1   | 2.37        | 1.78              | 3.48              |
| Top2a: topoisomerase (DNA) II alpha                                | 2.37        | 1.51              | 5.12              |
| LOC100045677: similar to DNA replication licensing factor MCM3 (D  | 2.37        | 1.6               | 4.26              |
| Hmgb2 /// OTTMUSG00000011058: high mobility group box 2 /// p      | 2.33        | 1.35              | 6.4               |
| Kif20a: kinesin family member 20A                                  | 2.33        | 1.37              | 4.39              |
| Usp1: ubiquitin specific peptdiase 1                               | 2.31        | 1.51              | 4.7               |
| Smc2: structural maintenance of chromosomes 2                      | 2.29        | 1.75              | 3.16              |

Supplementary Table 1. Chip U74Av2

|                                                                      |       |       |       |
|----------------------------------------------------------------------|-------|-------|-------|
| Plk4: polo-like kinase 4 (Drosophila)                                | 2.29  | 1.7   | 3.29  |
| Cadm1: cell adhesion molecule 1                                      | 2.28  | 2.07  | 2.53  |
| Kif4: kinesin family member 4                                        | 2.28  | 1.79  | 3.12  |
| Ahcy: S-adenosylhomocysteine hydrolase                               | 2.26  | 1.63  | 3.64  |
| Rad51: RAD51 homolog (S. cerevisiae)                                 | 2.25  | 1.71  | 3.12  |
| Cdc6: cell division cycle 6 homolog (S. cerevisiae)                  | 2.24  | 1.75  | 2.88  |
| Cdc7: cell division cycle 7 (S. cerevisiae)                          | 2.23  | 1.87  | 2.7   |
| Kif2c /// LOC631653: kinesin family member 2C /// similar to Kinesin | 2.23  | 1.7   | 3.19  |
| Plk1: polo-like kinase 1 (Drosophila)                                | 2.22  | 1.36  | 4.04  |
| Gnl3: guanine nucleotide binding protein-like 3 (nucleolar)          | 2.21  | 1.53  | 3.19  |
| Cks2 /// LOC100044764 /// LOC100046104 /// OTTMUSG000000221          | 2.21  | 1.49  | 3.98  |
| Rrs1: RRS1 ribosome biogenesis regulator homolog (S. cerevisiae)     | 2.21  | 1.4   | 4.39  |
| Trip13: thyroid hormone receptor interactor 13                       | 2.21  | 1.55  | 3.65  |
| Cdc25c: cell division cycle 25 homolog C (S. pombe)                  | 2.2   | 1.73  | 2.86  |
| Tacc3: transforming, acidic coiled-coil containing protein 3         | 2.19  | 1.45  | 4.08  |
| Prim1: DNA primase, p49 subunit                                      | 2.19  | 1.61  | 3.37  |
| Gldc: glycine decarboxylase                                          | 2.18  | 1.46  | 3.14  |
| Pola1: polymerase (DNA directed), alpha 1                            | 2.17  | 1.68  | 3.04  |
| Birc5: baculoviral IAP repeat-containing 5                           | 2.15  | 1.7   | 2.83  |
| Shmt1: serine hydroxymethyltransferase 1 (soluble)                   | 2.15  | 1.46  | 3.16  |
| Narg1: NMDA receptor-regulated gene 1                                | 2.15  | 1.48  | 3.64  |
| ENSMUSG00000045455 /// Timm8a1: predicted gene, ENSMUSG00            | 2.14  | 1.63  | 3.08  |
| Nfib: nuclear factor I/B                                             | 2.14  | 1.36  | 3.81  |
| Mad21l: MAD2 mitotic arrest deficient-like 1 (yeast)                 | 2.13  | 1.8   | 2.56  |
| Crip2: cysteine rich protein 2                                       | 2.13  | 1.6   | 2.91  |
| Dusp9: dual specificity phosphatase 9                                | 2.13  | 1.51  | 3.52  |
| Limch1: LIM and calponin homology domains 1                          | 2.13  | 1.89  | 2.41  |
| Anp32e: acidic (leucine-rich) nuclear phosphoprotein 32 family, mem  | 2.12  | 1.39  | 4.31  |
| Tcf7: transcription factor 7, T-cell specific                        | 2.11  | 1.38  | 3.44  |
| AU020206: expressed sequence AU020206                                | 2.11  | 1.73  | 2.68  |
| Ilf2: interleukin enhancer binding factor 2                          | 2.1   | 1.57  | 2.91  |
| Clic4: chloride intracellular channel 4 (mitochondrial)              | 2.1   | 1.73  | 2.56  |
| Uck2: uridine-cytidine kinase 2                                      | 2.08  | 1.22  | 4.32  |
| Ahcy: S-adenosylhomocysteine hydrolase                               | 2.07  | 1.78  | 2.38  |
| Rpa2: replication protein A2                                         | 2.06  | 1.51  | 3.07  |
| Brca1: breast cancer 1                                               | 2.06  | 1.59  | 2.81  |
| LOC630539 /// Trim59: similar to mouse RING finger 1 /// tripartite  | 2.05  | 1.29  | 3.74  |
| Cdca7l: cell division cycle associated 7 like                        | 2.05  | 1.66  | 2.49  |
| Fubp1: far upstream element (FUSE) binding protein 1                 | 2.04  | 1.58  | 2.53  |
| Prc1: protein regulator of cytokinesis 1                             | 2.04  | 1.38  | 3.38  |
| Hells: helicase, lymphoid specific                                   | 2.04  | 1.43  | 3.03  |
| Fign1: fidgetin-like 1                                               | 2.04  | 1.55  | 2.84  |
| Dck: deoxycytidine kinase                                            | 2.03  | 1.66  | 2.5   |
| Aurkb: aurora kinase B                                               | 2.03  | 1.62  | 2.7   |
| Prkrir: protein-kinase, interferon-inducible double stranded RNA de  | 2.03  | 1.68  | 2.48  |
| Aurka: aurora kinase A                                               | 2     | 1.26  | 3.61  |
| Wnt4: wntless-related MMTV integration site 4                        | -2.19 | -1.25 | -3.25 |
| Znrf2: zinc and ring finger 2                                        | -2.38 | -1.95 | -2.91 |
| 5728807_RC                                                           | -2.4  | -1.85 | -3.4  |

**Supplementary Table 2 (following 2 pages). Changes in gene expression patterns in ureteric buds cultured +/- GDNF (Murine Genome Set 430A).** Data are sorted for "fold change". Only genes with >2-fold change are listed. Full data are available at GEO.

Supplementary Table 2. Chip 430A

| gene                                                            | fold change | lower bound of FC | upper bound of FC |
|-----------------------------------------------------------------|-------------|-------------------|-------------------|
| Etv5: ets variant gene 5                                        | 5.52        | 3.06              | 12.37             |
| Cxcr4: chemokine (C-X-C motif) receptor 4                       | 5.17        | 3.87              | 6.95              |
| Crfl1: cytokine receptor-like factor 1                          | 4.38        | 3.14              | 6.76              |
| Myb: myeloblastosis oncogene                                    | 3.27        | 2.11              | 6.21              |
| LOC100046643 /// Spry1: similar to sprouty 1 /// sprouty homo   | 3.26        | 2.51              | 4.34              |
| Ccnd1: cyclin D1                                                | 3.16        | 2.16              | 5.02              |
| Ncapg: on-SMC condensin I complex, subunit G                    | 2.95        | 2.47              | 3.63              |
| Ret: ret proto-oncogene                                         | 2.88        | 1.83              | 4.49              |
| Mtm1: X-linked myotubular myopathy gene 1                       | 2.87        | 2.31              | 3.54              |
| Etv4: ets variant gene 4 (E1A enhancer binding protein, E1AF)   | 2.85        | 1.89              | 3.95              |
| Ccnd1: cyclin D1                                                | 2.84        | 2.36              | 3.54              |
| Arg2: arginase type II                                          | 2.8         | 2.29              | 3.42              |
| Hist1h2ab /// Hist1h2ac /// Hist1h2ad /// Hist1h2ae /// Hist1h2 | 2.72        | 2.34              | 3.18              |
| Cdc6: cell division cycle 6 homolog (S. cerevisiae)             | 2.7         | 1.64              | 3.87              |
| Arg2: arginase type II                                          | 2.69        | 2.23              | 3.25              |
| Fabp5: fatty acid binding protein 5, epidermal                  | 2.66        | 1.83              | 4.24              |
| Ccnb1 /// EG434175 /// EG667005: cyclin B1 /// predicted gene   | 2.66        | 1.77              | 4.62              |
| Psph: phosphoserine phosphatase                                 | 2.62        | 1.86              | 4.12              |
| Mcm6: minichromosome maintenance deficient 6 (MIS5 homol        | 2.62        | 1.81              | 4.67              |
| Ccnd1: cyclin D1                                                | 2.58        | 1.81              | 4.28              |
| Mtm1: X-linked myotubular myopathy gene 1                       | 2.55        | 1.94              | 3.52              |
| Dusp6: dual specificity phosphatase 6                           | 2.53        | 1.59              | 5.75              |
| Ung: uracil DNA glycosylase                                     | 2.51        | 2.07              | 3.15              |
| EG620603 /// Fabp5: predicted gene, EG620603 /// fatty acid b   | 2.5         | 2.05              | 3.18              |
| Smc4: structural maintenance of chromosomes 4                   | 2.5         | 1.6               | 5.06              |
| Vldlr: very low density lipoprotein receptor                    | 2.46        | 1.96              | 3.12              |
| Etv5: ets variant gene 5                                        | 2.46        | 1.62              | 3.82              |
| Asns: asparagine synthetase                                     | 2.45        | 1.93              | 3.32              |
| Ube2c: ubiquitin-conjugating enzyme E2C                         | 2.44        | 1.77              | 3.7               |
| Ccnb2: cyclin B2                                                | 2.43        | 2.04              | 2.91              |
| 2810433K01Rik: RIKEN cDNA 2810433K01 gene                       | 2.35        | 1.69              | 3.76              |
| Lmnb1: lamin B1                                                 | 2.34        | 1.67              | 3.45              |
| Hells: helicase, lymphoid specific                              | 2.33        | 1.88              | 3.01              |
| NcapH: non-SMC condensin I complex, subunit H                   | 2.28        | 1.86              | 2.91              |
| Mest: mesoderm specific transcript                              | 2.25        | 1.48              | 3.31              |
| Dck: deoxycytidine kinase                                       | 2.24        | 1.68              | 2.92              |
| Uhrf1: ubiquitin-like, containing PHD and RING finger domains,  | 2.23        | 1.77              | 2.98              |
| Ect2: ect2 oncogene                                             | 2.23        | 2                 | 2.53              |
| Brca1: breast cancer 1                                          | 2.23        | 1.74              | 3                 |
| Smc2: structural maintenance of chromosomes 2                   | 2.22        | 1.75              | 3                 |
| Rrm2: ribonucleotide reductase M2                               | 2.21        | 1.73              | 2.9               |
| Bub1: budding uninhibited by benzimidazoles 1 homolog (S. cer   | 2.21        | 1.9               | 2.6               |
| Fbxl10: F-box and leucine-rich repeat protein 10                | 2.21        | 1.73              | 2.86              |
| Incenp: inner centromere protein                                | 2.21        | 1.69              | 2.98              |
| Ctnnd2 /// LOC100045979: catenin (cadherin associated protein   | 2.2         | 1.91              | 2.57              |

Supplementary Table 2. Chip 430A

|                                                                   |       |       |       |
|-------------------------------------------------------------------|-------|-------|-------|
| Spred2: sprouty-related, EVH1 domain containing 2                 | 2.2   | 1.87  | 2.61  |
| Rfc4: replication factor C (activator 1) 4                        | 2.2   | 1.61  | 3.42  |
| Cep55: centrosomal protein 55                                     | 2.19  | 1.9   | 2.57  |
| Rad51: RAD51 homolog (S. cerevisiae)                              | 2.18  | 1.72  | 2.87  |
| Prpf40a: PRP40 pre-mRNA processing factor 40 homolog A (yea       | 2.18  | 1.45  | 3.18  |
| Snrpd3: small nuclear ribonucleoprotein D3                        | 2.16  | 1.43  | 2.94  |
| Gpsm2: G-protein signalling modulator 2 (AGS3-like, C. elegans)   | 2.15  | 1.87  | 2.48  |
| Sostdc1: sclerostin domain containing 1                           | 2.14  | 1.63  | 2.7   |
| Dut: deoxyuridine triphosphatase                                  | 2.14  | 1.84  | 2.5   |
| 2810417H13Rik: RIKEN cDNA 2810417H13 gene                         | 2.13  | 1.8   | 2.56  |
| Cadm1: cell adhesion molecule 1                                   | 2.12  | 1.84  | 2.44  |
| Wnt11: wingless-related MMTV integration site 11                  | 2.12  | 1.47  | 3.02  |
| Ccnb1: cyclin B1                                                  | 2.11  | 1.75  | 2.59  |
| Shcbp1: Shc SH2-domain binding protein 1                          | 2.11  | 1.7   | 2.72  |
| Mki67: antigen identified by monoclonal antibody Ki 67            | 2.11  | 1.83  | 2.49  |
| Spry2: sprouty homolog 2 (Drosophila)                             | 2.11  | 1.69  | 2.71  |
| Trib2: tribbles homolog 2 (Drosophila)                            | 2.1   | 1.36  | 3     |
| Cdc2a: cell division cycle 2 homolog A (S. pombe)                 | 2.09  | 1.57  | 2.82  |
| Ccna2: cyclin A2                                                  | 2.09  | 1.79  | 2.49  |
| Kif22: kinesin family member 22                                   | 2.09  | 1.45  | 3.65  |
| LOC14210: hypothetical LOC14210                                   | 2.07  | 1.68  | 2.62  |
| Racgap1: Rac GTPase-activating protein 1                          | 2.07  | 1.81  | 2.36  |
| Top2a: topoisomerase (DNA) II alpha                               | 2.07  | 1.55  | 2.99  |
| Cth: cystathionase (cystathionine gamma-lyase)                    | 2.07  | 1.57  | 3     |
| Ctps: cytidine 5'-triphosphate synthase                           | 2.06  | 1.7   | 2.6   |
| Gpt2: glutamic pyruvate transaminase (alanine aminotransferase)   | 2.06  | 1.57  | 2.88  |
| 100039943 /// 100040234 /// 100041386 /// 100041667 /// 10        | 2.05  | 1.59  | 2.87  |
| Exo1: exonuclease 1                                               | 2.05  | 1.68  | 2.55  |
| Figl1: fidgetin-like 1                                            | 2.05  | 1.75  | 2.42  |
| Nol5: nucleolar protein 5                                         | 2.05  | 1.75  | 2.45  |
| Plk4: polo-like kinase 4 (Drosophila)                             | 2.05  | 1.9   | 2.22  |
| Kif20a: kinesin family member 20A                                 | 2.04  | 1.46  | 2.98  |
| Birc5: baculoviral IAP repeat-containing 5                        | 2.04  | 1.75  | 2.44  |
| Idi1: isopentenyl-diphosphate delta isomerase                     | 2.04  | 1.67  | 2.61  |
| Trip13: thyroid hormone receptor interactor 13                    | 2.04  | 1.85  | 2.28  |
| Rrm2: ribonucleotide reductase M2                                 | 2.04  | 1.78  | 2.37  |
| LOC100045677 /// Mcm3: similar to DNA replication licensing fa    | 2.04  | 1.52  | 2.89  |
| Vldlr: very low density lipoprotein receptor                      | 2.03  | 1.73  | 2.38  |
| Aldh1a1: aldehyde dehydrogenase family 1, subfamily A1            | 2.02  | 1.37  | 2.79  |
| Ccne2: cyclin E2                                                  | 2.01  | 1.64  | 2.56  |
| LOC100045677 /// Mcm3: similar to DNA replication licensing fa    | 2.01  | 1.33  | 3.4   |
| Slc40a1: solute carrier family 40 (iron-regulated transporter), m | -2.09 | -1.54 | -2.89 |
| H2-D4: histocompatibility 2, D region locus 4                     | -2.1  | -1.67 | -2.7  |
| Pth1r: parathyroid hormone 1 receptor                             | -2.11 | -1.49 | -2.88 |
| Hspb1: heat shock protein 1                                       | -2.23 | -2.03 | -2.46 |
| Hspb1: heat shock protein 1                                       | -2.23 | -2    | -2.51 |

**a) *Etv4-lacZ* mutants**

| <i>Etv4</i> | <i>Etv5</i> | N  | normal | hypoplastic kidney | kidney absent | ureter absent |
|-------------|-------------|----|--------|--------------------|---------------|---------------|
| +/+         | +/+         | 43 | 100%   | 0%                 | 0%            | 0%            |
| +/-         | +/+         | 90 | 96%    | 4%                 | 0%            | 0%            |
| -/-         | +/+         | 75 | 89%    | 9%                 | 2%            | 0%            |

**b) *Etv4-lacZ*; *Etv5-lacZ* compound mutants**

| <i>Etv4</i> | <i>Etv5</i> | N  | normal    | hypoplastic kidney | kidney absent | ureter absent |
|-------------|-------------|----|-----------|--------------------|---------------|---------------|
| +/+         | +/-         | 27 | 100%      | 0%                 | 0%            | 0%            |
| +/-         | +/-         | 46 | 76%       | 15%                | 8%            | 5%            |
| <b>-/-</b>  | <b>+/-</b>  | 37 | <b>8%</b> | <b>52%</b>         | <b>41%</b>    | <b>22%</b>    |

**c) *Etv4-lacZ*; *Etv5<sup>M</sup>* compound mutants**

| <i>Etv4</i> | <i>Etv5</i> | N  | normal    | hypoplastic kidney | kidney absent | ureter absent |
|-------------|-------------|----|-----------|--------------------|---------------|---------------|
| +/+         | +/M         | 26 | 100%      | 0%                 | 0%            | 0%            |
| +/+         | M/M         | 9  | 100%      | 0%                 | 0%            | 0%            |
| +/-         | +/M         | 50 | 100%      | 0%                 | 0%            | 0%            |
| -/-         | +/M         | 35 | 71%       | 7%                 | 21%           | 0%            |
| +/-         | M/M         | 25 | 58%       | 18%                | 24%           | 0%            |
| <b>-/-</b>  | <b>M/M</b>  | 7  | <b>0%</b> | <b>*** 7%</b>      | <b>93%</b>    | <b>29%</b>    |

**Supplementary Table 3. Frequency of renal and ureteric defects in single and compound *Etv4/Etv5* mutant newborn mice with two different *Etv5* knockout alleles. a, wild types and *Etv4-lacZ* mutants. b, *Etv5-lacZ* mutants and *Pea-lacZ*;*Etv5-lacZ* compound mutants. No *Etv5-lacZ* homozygotes were obtained, as this allele is recessive lethal at E8.5. c, *Etv5<sup>M</sup>* mutants and *Etv4-lacZ*;*Etv5<sup>M</sup>* compound mutants. \*\*\*, extreme hypodysplasia – see Fig. 4 i, k. N = number of mice analyzed. The two most severely affected genotypes are shown in bold.**

### ***Etv4-lacZ; Etv5-lacZ* compound mutants**

| <i>Etv4</i> | <i>Etv5</i> | N        | normal branching | reduced branching | no branching | UB absent |    |
|-------------|-------------|----------|------------------|-------------------|--------------|-----------|----|
|             |             | controls | 68               | 93%               | 7%           | 0%        | 1% |
| -/-         | +/+         | 26       | 79%              | 13%               | 6%           | 2%        |    |
| +/-         | +/-         | 25       | 78%              | 16%               | 2%           | 4%        |    |
| -/-         | +/-         | 29       | 26%              | 19%               | 40%          | 16%       |    |

**Supplementary Table 4. Frequency of defects in the *in vivo* outgrowth and early branching of the ureteric bud in *Etv4-lacZ;Etv5-lacZ* single and compound mutants.** Embryos were evaluated at E11.5 – E12.5. Controls include wild types, *Etv4*<sup>+/-</sup> heterozygotes and *Etv5*<sup>+/-</sup> heterozygotes. N= number of embryos analyzed.

| <b>allele</b>           | <b>primer 1</b>                | <b>primer 2</b>             | <b>product</b> |
|-------------------------|--------------------------------|-----------------------------|----------------|
| <b><i>Etv4</i> WT</b>   | 5' CGGTCTTCAGAAAGCAGAGG 3'     | 5' GAGCCTTCGACTCCTGACAC 3'  | 247 bp         |
| <b><i>Etv4-lacZ</i></b> | 5' GAAGCCACCACTCCCCTAC 3'      | 5' CCAAAAGACGGCAATATGGT 3'  | ~ 200 bp       |
| <b><i>Etv5</i> WT</b>   | 5' ATTAGCAGCTCACTAGCATGTTCC 3' | 5' CGTTGAGCCAGCCACTTCTTC 3' | 833 bp         |
| <b><i>Etv5-lacZ</i></b> | 5' AAGCACAGCCTCTGTTGAGC 3'     | 5' ACACCGGCCTTATTCCAAG 3'   | ~ 500 bp       |

**Supplementary Table 5.** PCR primers used for genotyping *Etv4-lacZ* and *Etv5-lacZ* mice.
